# Supplementary material
Source: PubMed Central journal article supplement (PMC8610201)
Supplement: mmc1.pdf [file mmc1.pdf]

# THE LANCET

## Infectious Diseases

### Supplementary appendix 1

This translation in Hindi was submitted by the authors and we reproduce it as supplied. It has not been peer reviewed. *The Lancet's* editorial processes have only been applied to the original in English, which should serve as reference for this manuscript.

Supplement to: Desai D, Khan AR, Soneja M, et al. Effectiveness of an inactivated virus-based SARS-CoV-2 vaccine, BBV152, in India: a test-negative, case-control study. *Lancet Infect Dis* 2021; published online Nov 23. [https://doi.org/10.1016/S1473-3099\(21\)00674-5](https://doi.org/10.1016/S1473-3099(21)00674-5).

हिंदी में यह अनुवाद लेखकों द्वारा प्रस्तुत किया गया था और हम इसे जैसे उपलब्ध कराया गया वैसे पुनः पेश करते हैं। इस पर सहकर्मी की समीक्षा नहीं की गई है। लैंसेट की संपादकीय प्रक्रियाओं को केवल अंग्रेजी में मूल पर लागू किया गया है, जो इस पांडुलिपि के संदर्भ के रूप में काम आना चाहिए।

भारत में असक्रिय विषाणु आधारित सार्स-कोवि-२ टीका, बीबीवी-१५२, की प्रभावशीलता: एक परीक्षण-नकारात्मक, केस-कण्ट्रोल अध्ययन

## सारांश

**पृष्ठभूमि:** बीबीवी-१५२ एक संपूर्ण विरियन असक्रिय विषाणु आधारित सार्स-कोवि-२ टीका है जिसे भारत में उपयोग किया गया है। परीक्षण के चरण-३ के परिणामों ने बीबीवी-१५२ की नैदानिक प्रभावकारिता को दर्शाया है। हमने लक्षणिक आरटी-पीसीआर से पुष्टि किये गए सार्स-कोवि-२ संक्रमण के खिलाफ बीबीवी-१५२ की प्रभावशीलता का मूल्यांकन करने का लक्ष्य रखा था।

**तरीका:** हमने भारत में कोविड-१९ महामारी की दूसरी लहर के चरम, १५ अप्रैल और १५ मई, २०२१, के दौरान अखिल भारतीय आयुर्विज्ञान संस्थान (नई दिल्ली, भारत में एक तृतीयक स्वास्थ्य देखभाल अस्पताल) के कर्मचारियों के बीच एक परीक्षण-नकारात्मक, केस-कण्ट्रोल अध्ययन संचालित किया, जिनमें कोविड-१९ के लक्षण थे और जिनकी सार्स-कोवि-२ के लिए आरटी-पीसीआर द्वारा जाँच की गई थी। रोगियों (पॉजिटिव जाँच वाले) और स्वस्थ लोगों (नेगेटिव जाँच वाले) का उम्र और लिंग के आधार पर मिलान (१:१) किया गया। बीबीवी-१५२ के साथ टीकाकरण के अनुपात की तुलना रोगियों और स्वस्थ लोगों के बीच की गई और व्यावसायिक जोखिम (कोविड-१९ हेतु) के स्तर, पिछली सार्स-कोवि-२ संक्रमण और कैलेंडर समय स्थितिजन्य तार्किक प्रतिगमन का उपयोग करके समायोजित किया गया। प्राथमिक परिणामों में लक्षणिक आरटी-पीसीआर से पुष्टि वाले सार्स-कोवि-२ संक्रमण की संभावना को कम करने में बीबीवी-१५२ की दोनों टीकों (दूसरी खुराक जाँच से कम से कम १४ दिन पहले दी गई) की प्रभावशीलता थी, जिसे  $(1 - \text{ऑड्स अनुपात}) \times 100\%$  के रूप में व्यक्त किया गया था।

**परिणाम:** १५ अप्रैल से १५ मई २०२१ के बीच ३७३२ लोगों की आरटी-पीसीआर जाँच की गयी थी। इनमें से २७१४ लक्षणिक कर्मचारियों के टीकाकरण के आंकड़े उपलब्ध थे, और १०६८ मिलान किए गए केस-कंट्रोल (रोगी-स्वस्थ लोग) जोड़े विश्लेषण के लिए उपलब्ध थे। जाँच से कम से कम १४ दिन पूर्व लगाए दोनों टीकों के बाद लक्षणिक कोविड-१९ के विरुद्ध बीबीवी-१५२ की समायोजित प्रभावशीलता ५०% (९५% सीआई ३३-६२; पी <०.००००१) थी। परीक्षण से कम से कम २८ दिन पूर्व लगाए दोनों टीकों की समायोजित प्रभावशीलता ४६% (९५% सीआई २२-६२) थी और परीक्षण से कम से कम ४२ दिन पूर्व लगाए दोनों टीकों की समायोजित प्रभावशीलता ५७% (२१-७६) थी। पूर्व सार्स-कोवि-२ संक्रमण प्रभावित प्रतिभागियों को बाहर करने के बाद, परीक्षण से कम से कम १४ दिन पूर्व लगाए दोनों टीकों की समायोजित प्रभावशीलता ४७% (९५% सीआई २९-६१) थी।

**व्याख्या:** यह अध्ययन कोविड-१९ के मामले में हुई बेतहाशा वृद्धि, संभावित सार्स-को-२ के प्रतिरक्षा-आक्रामक डेल्टा रूप (बी १.६१७.२) द्वारा फैलने के कारण, के संदर्भ में लक्षणिक कोविड-१९ के विरुद्ध बीबीवी-१५२ के दो टीकों की प्रभावशीलता को दर्शाता है। हमारे सर्वेक्षण के परिणाम सार्स-कोवि-२ के प्रसार को नियंत्रण करने में सहायता करने हेतु इस टिके के जारी प्रयोग को समर्थन देते हैं, साथ ही गैर-औषधीय उपायों को अपनाने को जारी रखने पर भी जोर देते हैं।

**वित्त पोषण:** कुछ भी नहीं
