# Supplementary material
Source: PubMed Central journal article supplement (PMC8610201)
Supplement: mmc2.pdf [file mmc2.pdf]

# THE LANCET

## Infectious Diseases

### Supplementary appendix 2

This appendix formed part of the original submission and has been peer reviewed. We post it as supplied by the authors.

Supplement to: Desai D, Khan AR, Soneja M, et al. Effectiveness of an inactivated virus-based SARS-CoV-2 vaccine, BBV152, in India: a test-negative, case-control study. *Lancet Infect Dis* 2021; published online Nov 23. [https://doi.org/10.1016/S1473-3099\(21\)00674-5](https://doi.org/10.1016/S1473-3099(21)00674-5).

## Supplementary appendix

|   |                                                                                                                                     | <b>Page numbers</b> |
|---|-------------------------------------------------------------------------------------------------------------------------------------|---------------------|
| 1 | Table S1: Definitions                                                                                                               | 2                   |
| 2 | Table S2: Participant characteristics of the unmatched population                                                                   | 3                   |
| 3 | Table S3: Estimated vaccine effectiveness against laboratory confirmed symptomatic SARS-CoV-2 infection of the unmatched population | 4                   |

**Table S1: Definitions**

| Term                            | Definition                                                                                                                                                                                                                                                                                                                                                                                                                                                                                                                                     |
|---------------------------------|------------------------------------------------------------------------------------------------------------------------------------------------------------------------------------------------------------------------------------------------------------------------------------------------------------------------------------------------------------------------------------------------------------------------------------------------------------------------------------------------------------------------------------------------|
| Symptoms suggestive of COVID-19 | An acute respiratory illness with fever and cough with onset within the preceding 10 days.                                                                                                                                                                                                                                                                                                                                                                                                                                                     |
| High-risk exposure              | <p>Any of the following:</p> <ol style="list-style-type: none"> <li>1. Performed a respiratory Aerosol Generating Procedure (AGP) without ANY of the following – N95 mask, eye/face protection, gloves.</li> <li>2. If the patient’s respiratory tract secretions, or saliva came in contact with non-intact skin</li> <li>3. Anyone in close proximity (within 1 meter) of the confirmed case without mask (BOTH case and contact) for a duration of more than 15 minutes.</li> <li>4. Household contact of a known positive case.</li> </ol> |
| Previous SARS-CoV-2 infection   | Presence of a positive microbiological test for SARS-CoV-2 (RT-PCR, CB-NAAT or rapid antigen test) more than 90 days prior to the current RT-PCR                                                                                                                                                                                                                                                                                                                                                                                               |
| Level of occupational exposure  |                                                                                                                                                                                                                                                                                                                                                                                                                                                                                                                                                |
| COVID-19 areas                  | Part of the normal chain of care for suspected and proven COVID-19 patients (eg. testing facility, emergency wards, holding wards for COVID-19 suspects pending test results and dedicated COVID-19 wards/ICUs/laboratories). Employees working here wear personal protective equipment (PPE) that include coverall, N-95 mask, goggles/face shield, gloves and shoe-covers.                                                                                                                                                                   |
| Non-COVID-19 areas              | All other parts of the institute including wards/ICUs meant for the care of non-COVID-19 diseases, administrative and residential areas. Patients are admitted in non-COVID-19 wards/ICUs after testing negative for SARS-CoV-2 by RT-PCR or CB-NAAT. The detection of a COVID-19 patient or employee in non-COVID-19 areas requires immediate isolation of the case in a COVID-19 area, tracing of contacts and decontamination. Employees working here wear varying levels of PPE.                                                           |

**Table S2: Participant characteristics of the unmatched population**

|                                         | Symptomatic SARS-CoV-2 RT-PCR positive participants (n =1617) | Symptomatic SARS-CoV-2 RT-PCR negative participants (n =1097) | P value | Unvaccinated participants (n =1282) | Participants vaccinated with only 1 dose of BBV152 (n =679) | P value (one dose vs. unvaccinated) | Participants vaccinated with 2 doses of BBV152 (n=753) | P value (two vs. unvaccinated) |
|-----------------------------------------|---------------------------------------------------------------|---------------------------------------------------------------|---------|-------------------------------------|-------------------------------------------------------------|-------------------------------------|--------------------------------------------------------|--------------------------------|
| Age, years                              |                                                               |                                                               |         |                                     |                                                             |                                     |                                                        |                                |
| <30 years                               | 573 (35.4)                                                    | 494 (45.0)                                                    | <0.0001 | 532 (41.5)                          | 290 (42.7)                                                  | 0.44                                | 245 (32.5)                                             | <0.0001                        |
| 31-40 years                             | 531 (32.8)                                                    | 363 (33.1)                                                    |         | 426 (33.2)                          | 222 (32.7)                                                  |                                     | 246 (32.7)                                             |                                |
| 41-50 years                             | 315 (19.5)                                                    | 161 (14.7)                                                    |         | 215 (16.8)                          | 109 (16.1)                                                  |                                     | 152 (20.2)                                             |                                |
| 51-60 years                             | 174 (10.8)                                                    | 72 (6.6)                                                      |         | 90 (7.0)                            | 55 (8.1)                                                    |                                     | 101 (13.4)                                             |                                |
| 61-70 years                             | 18 (1.1)                                                      | 6 (0.5)                                                       |         | 14 (1.1)                            | 3                                                           |                                     | 7 (0.9)                                                |                                |
| >70 years                               | 6 (0.4)                                                       | 1 (0.1)                                                       |         | 5 (0.4)                             | 0                                                           |                                     | 2 (0.3)                                                |                                |
| Gender                                  |                                                               |                                                               |         |                                     |                                                             |                                     |                                                        |                                |
| Female                                  | 685 (42.4)                                                    | 506 (46.1)                                                    | 0.054   | 580 (45.2)                          | 332 (48.9)                                                  | 0.13                                | 279 (37.1)                                             | <0.0001                        |
| Male                                    | 932 (57.6)                                                    | 591 (53.9)                                                    |         | 702 (54.8)                          | 347 (51.1)                                                  |                                     | 474 (62.9)                                             |                                |
| Previous SARS-CoV-2 infection           | 48 (3.0)                                                      | 119 (10.8)                                                    | <0.0001 | 76 (5.9)                            | 47 (6.9)                                                    | 0.38                                | 44 (5.8)                                               | 0.99                           |
| Occupational exposure                   |                                                               |                                                               |         |                                     |                                                             |                                     |                                                        |                                |
| Works in COVID-19 area                  | 243 (15.0)                                                    | 176 (16.0)                                                    | 0.48    | 219 (17.1)                          | 96 (14.1)                                                   | 0.093                               | 104 (13.8)                                             | 0.052                          |
| Works in non-COVID-19 area              | 1374 (85.0)                                                   | 921 (84.0)                                                    |         | 1063 (82.9)                         | 583 (85.9)                                                  |                                     | 649 (86.2)                                             |                                |
| 10 day period of testing                |                                                               |                                                               |         |                                     |                                                             |                                     |                                                        |                                |
| April 15–April 25                       | 852 (52.7)                                                    | 465 (42.4)                                                    | <0.001  | 680 (53.0)                          | 303 (44.6)                                                  | 0.0018                              | 334 (44.4)                                             | <0.0001                        |
| April 26–May 5                          | 624 (38.6)                                                    | 407 (37.1)                                                    |         | 454 (35.4)                          | 287 (42.3)                                                  |                                     | 290 (38.5)                                             |                                |
| May 6-May 15                            | 141 (8.7)                                                     | 225 (20.5)                                                    |         | 148 (11.5)                          | 89 (13.1)                                                   |                                     | 129 (17.1)                                             |                                |
| Vaccination Status                      |                                                               |                                                               |         |                                     |                                                             |                                     |                                                        |                                |
| Vaccinated with only one dose of BBV152 | 399 (24.7)                                                    | 280 (25.5)                                                    | <0.0001 |                                     |                                                             |                                     |                                                        |                                |
| Vaccinated with two doses of BBV152     | 394 (24.3)                                                    | 359 (32.7)                                                    |         |                                     |                                                             |                                     |                                                        |                                |
| Unvaccinated                            | 824 (60.0)                                                    | 458 (41.8)                                                    |         |                                     |                                                             |                                     |                                                        |                                |
| Data are n(%).                          |                                                               |                                                               |         |                                     |                                                             |                                     |                                                        |                                |

**Table S3: Estimated vaccine effectiveness against laboratory confirmed symptomatic SARS-CoV-2 infection of the unmatched population**

|                                                                                                                | Symptomatic SARS-CoV-2 RT-PCR positive | Symptomatic SARS-CoV-2 RT-PCR negative | Unadjusted OR (95% CI) | Unadjusted p value | Adjusted OR (95% CI)* | Adjusted p value* | Vaccine effectiveness (95% CI) |
|----------------------------------------------------------------------------------------------------------------|----------------------------------------|----------------------------------------|------------------------|--------------------|-----------------------|-------------------|--------------------------------|
| Unvaccinated                                                                                                   | 824                                    | 458                                    | 1 (ref)                | ..                 | 1 (ref)               | ..                | ..                             |
| Only one dose of BBV152                                                                                        |                                        |                                        |                        |                    |                       |                   |                                |
| Tested at least 7 days after first dose                                                                        | 359                                    | 244                                    | 0.82 (0.67-0.99)       | 0.047              | 0.86 (0.70-1.06)      | 0.16              | 14 (-6 to 30)                  |
| Tested less than 7 days after first dose                                                                       | 40                                     | 36                                     | 0.62 (0.39-0.98)       | 0.042              | 0.57 (0.36-0.92)      | 0.020             | 43 (8 to 64)                   |
| Tested at least 21 days after 1st dose                                                                         | 181                                    | 115                                    | 0.87(0.67-1.13)        | 0.31               | 0.95(0.72-1.25)       | 0.71              | 5 (-25 to 28)                  |
| Two doses of BBV152                                                                                            |                                        |                                        |                        |                    |                       |                   |                                |
| Tested at least 14 days after second dose                                                                      | 319                                    | 298                                    | 0.59 (0.49-0.72)       | <0.0001            | 0.56 (0.45-0.68)      | <0.0001           | 44 (32 to 55)                  |
| Tested less than 14 days after second dose                                                                     | 75                                     | 61                                     | 0.68 (0.48-0.98)       | 0.037              | 0.69 (0.48-1.00)      | 0.052             | 31 (0 to 52)                   |
| Tested at least 28 days after second dose                                                                      | 205                                    | 196                                    | 0.58 (0.47-0.73)       | <0.0001            | 0.57 (0.45-0.73)      | <0.0001           | 43 (27 to 55)                  |
| Tested at least 42 days after second dose                                                                      | 73                                     | 94                                     | 0.43 (0.31-0.60)       | <0.0001            | 0.45 (0.31-0.64)      | <0.0001           | 55 (36 to 69)                  |
| Two doses of BBV152 with second dose at least 14 days before testing, by 10-day period of testing              |                                        |                                        |                        |                    |                       |                   |                                |
| April 15–April 25                                                                                              | 155                                    | 102                                    | 0.78 (0.58-1.04)       | 0.094              | 0.65 (0.47-0.89)      | 0.0067            | 35 (11 to 53)                  |
| April 26–May 5                                                                                                 | 128                                    | 118                                    | 0.49 (0.36-0.67)       | <0.0001            | 0.45 (0.32-0.63)      | <0.0001           | 55 (37 to 68)                  |
| May 6-May 15                                                                                                   | 36                                     | 78                                     | 0.66 (0.39-1.10)       | 0.11               | 0.61 (0.35-1.04)      | 0.068             | 39 (-4 to 65)                  |
| Unvaccinated, by 10-day period of testing                                                                      |                                        |                                        |                        |                    |                       |                   |                                |
| April 15–April 25                                                                                              | 450                                    | 230                                    |                        |                    |                       |                   |                                |
| April 26–May 5                                                                                                 | 313                                    | 141                                    |                        |                    |                       |                   |                                |
| May 6-May 15                                                                                                   | 61                                     | 87                                     |                        |                    |                       |                   |                                |
| Female participants                                                                                            |                                        |                                        |                        |                    |                       |                   |                                |
| Two doses of BBV152 with second dose at least 14 days before testing                                           | 107                                    | 121                                    | 0.49 (0.36-0.67)       | <0.0001            | 0.44 (0.32-0.62)      | <0.0001           | 56 (38 to 68)                  |
| Unvaccinated                                                                                                   | 372                                    | 208                                    |                        |                    |                       |                   |                                |
| Males                                                                                                          |                                        |                                        |                        |                    |                       |                   |                                |
| Two doses of BBV152 with second dose at least 14 days before testing                                           | 212                                    | 177                                    | 0.66 (0.51-0.85)       | 0.0014             | 0.61 (0.47-0.81)      | 0.0004            | 39 (19 to 53)                  |
| Unvaccinated                                                                                                   | 452                                    | 250                                    |                        |                    |                       |                   |                                |
| Excluding those with previous SARS-CoV-2 infection                                                             |                                        |                                        |                        |                    |                       |                   |                                |
| Two doses of BBV152 with second dose at least 14 days before testing                                           | 315                                    | 268                                    | 0.61 (0.49-0.74)       | <0.0001            | 0.58 (0.47-0.71)      | <0.0001           | 42 (29 to 53)                  |
| Unvaccinated                                                                                                   | 796                                    | 410                                    |                        |                    |                       |                   |                                |
| Data are n unless otherwise stated. OR= odds ratio.                                                            |                                        |                                        |                        |                    |                       |                   |                                |
| * Adjusted for age, gender, previous SARS-CoV-2 infection, occupational exposure and 10-day period of testing. |                                        |                                        |                        |                    |                       |                   |                                |
